# Supplementary material for: Brief communication: Characteristic properties of extreme wave events observed in the northern Baltic Proper, Baltic Sea
Source: Copernicus journal article supplement (doi:10.5194/nhess-17-1653-2017), 2017-09-25
Supplement: Supplementary file 1 [file nhess-17-1653-2017-supplement.zip]

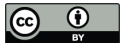

## *Supplement of*

# **Brief communication: Characteristic properties of extreme wave events observed in the northern Baltic Proper, Baltic Sea**

**Jan-Victor Bjö et al.**

*Correspondence to:* Jan-Victor Björkqvist ([jan-victor.bjorkqvist@fmi.fi](mailto:jan-victor.bjorkqvist@fmi.fi))

- [nhess-17-1653-2017-supplement-title-page.pdf](#)
- [WAM\\_NBP2004\\_00h\\_prior](#)
- [WAM\\_NBP2004\\_06h\\_prior](#)
- [WAM\\_NBP2004\\_12h\\_prior](#)
- [WAM\\_NBP2004\\_18h\\_prior](#)
- [WAM\\_NBP2004\\_24h\\_prior](#)
- [WAM\\_NBP2017\\_00h\\_prior](#)
- [WAM\\_NBP2017\\_06h\\_prior](#)
- [WAM\\_NBP2017\\_12h\\_prior](#)
- [WAM\\_NBP2017\\_18h\\_prior](#)
- [WAM\\_NBP2017\\_24h\\_prior](#)
- [Wave\\_buoy\\_1999a](#)
- [Wave\\_buoy\\_1999b](#)
- [Wave\\_buoy\\_2004](#)
- [Wave\\_buoy\\_2005](#)
- [Wave\\_buoy\\_2017](#)
- [readme.txt](#)

The copyright of individual parts of the supplement might differ from the CC BY 3.0 License.
